# Supplementary material for: Imidazolium-functionalized anion exchange membranes using poly(ether sulfone)s as macrocrosslinkers for fuel cells
Source: Royal Society of Chemistry journal article supplement (doi:10.1039/c7ra04170e), 2017-01-01
Supplement: c7ra04170e1.pdf [file c7ra04170e1.pdf]

## Supplementary Information

# Imidazolium-functionalized anion exchange membranes using poly(ether sulfone)s as macrocrosslinker for fuel cells

Xiao Ling Huang, Chen Xiao Lin, En Ning Hu, Faizal Soyekwo, Qiu Gen Zhang, Ai Mei Zhu,

Qing Lin Liu\*

*Fujian Provincial Key Laboratory of Theoretical and Computational Chemistry, Department of*

*Chemical & Biochemical Engineering, College of Chemistry and Chemical Engineering, Xiamen*

*University, Xiamen 361005, P. R. China*

\*Corresponding author:

Q.L. Liu, E-mail: qlliu@xmu.edu.cn, Tel: 86-592-2188072, Fax: 86-592-2184822

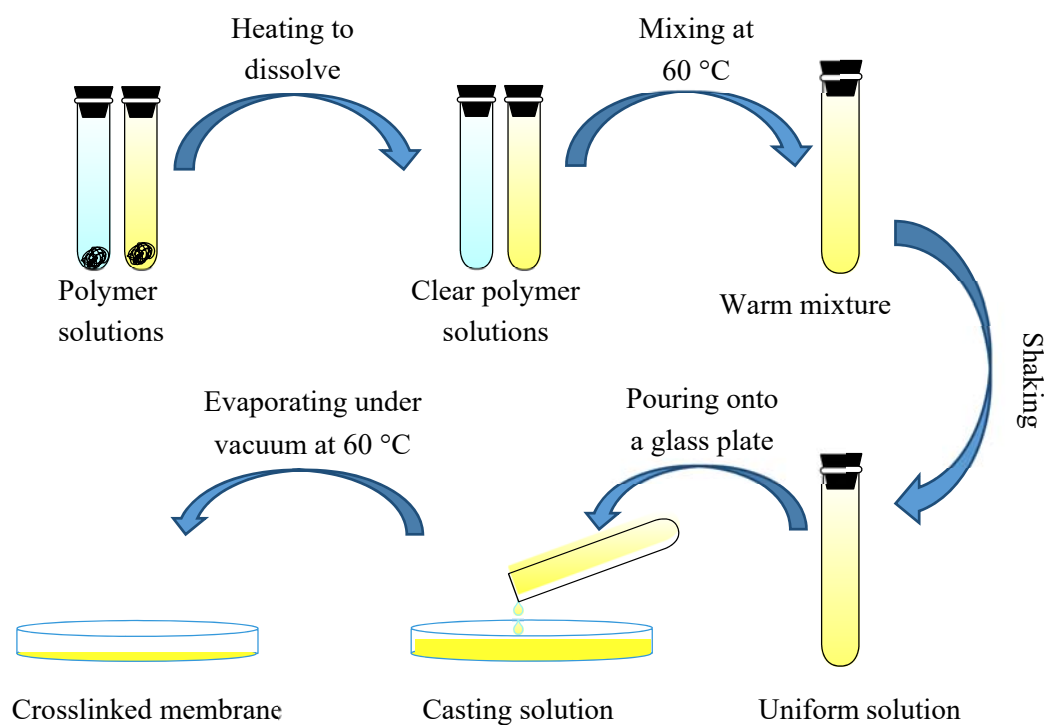

**Scheme S1** Preparation of the crosslinked PES/PVIL-x membranes

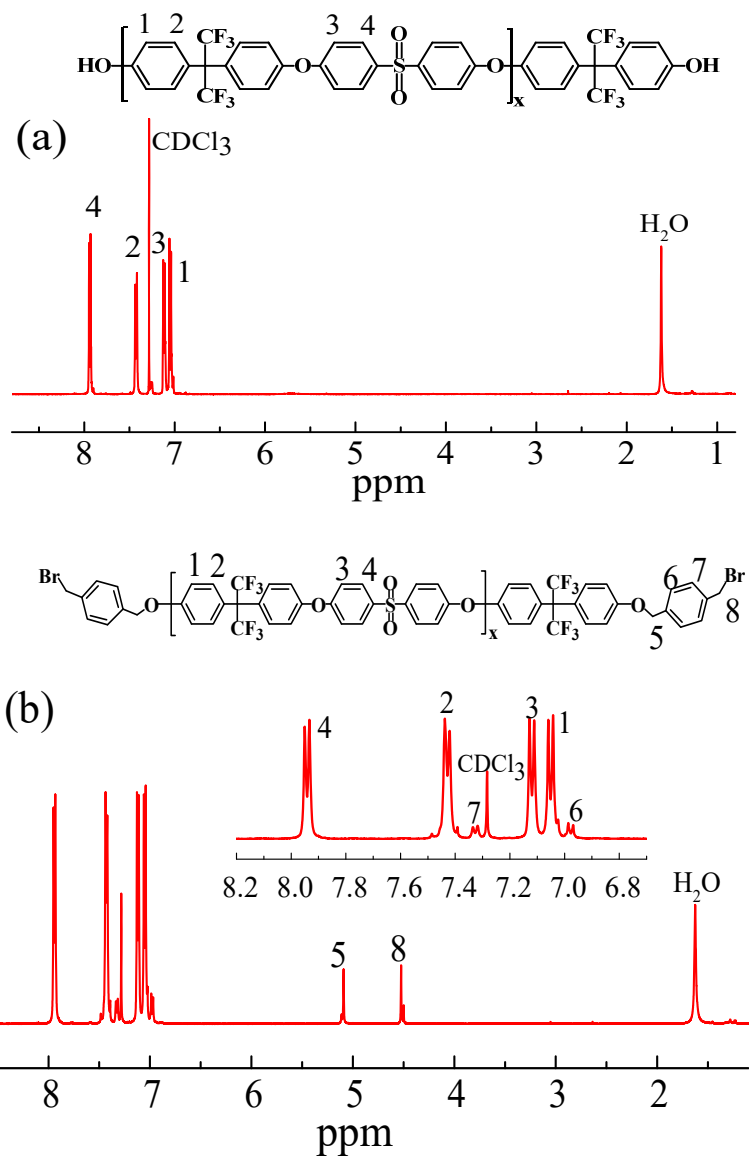

**Fig. S1**  $^1\text{H}$  NMR spectra of (a) HO-PES-OH and (b) Br-PES-Br in  $\text{CDCl}_3$

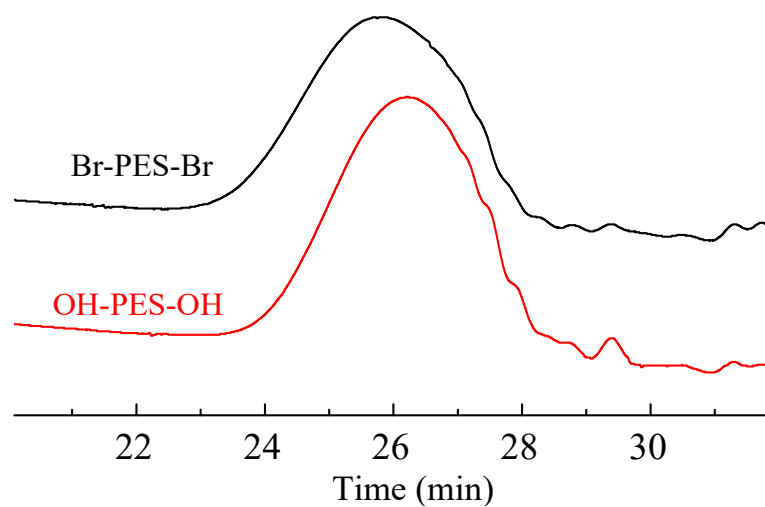

**Fig. S2** GPC plots of HO-PES-OH and Br-PES-Br in the experiment.

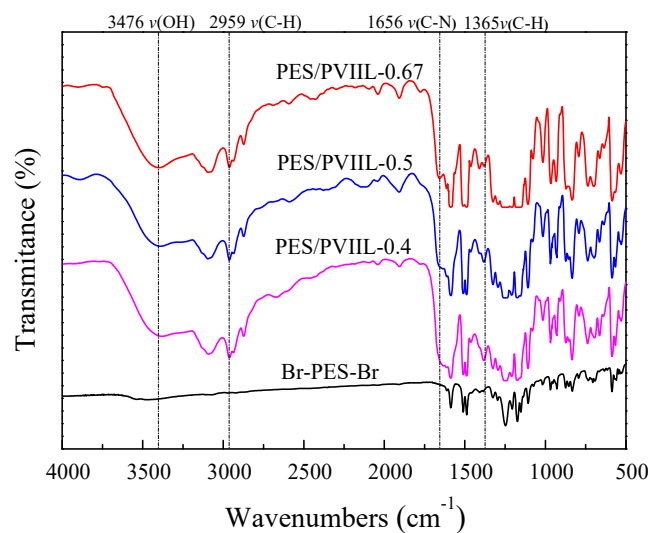

**Fig. S3** FT-IR spectra of the PES/PVlIL-x membranes and Br-PES-Br.

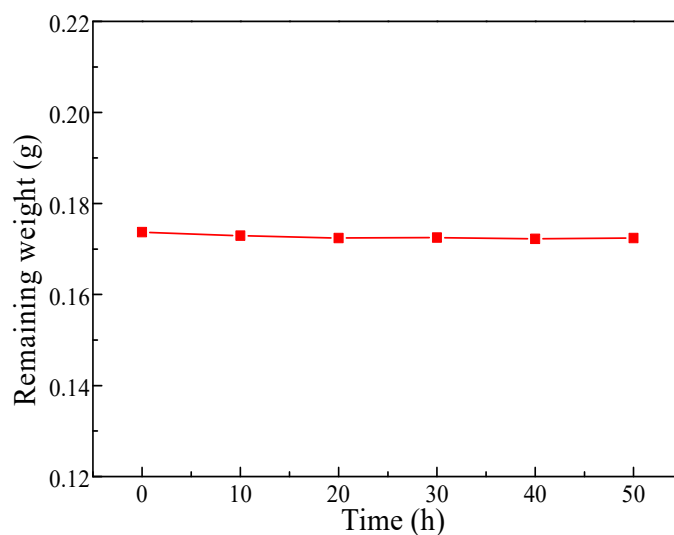

**Fig. S4** Time dependent remaining weight of the PES/PVlIL-0.4 membrane at 120 °C.

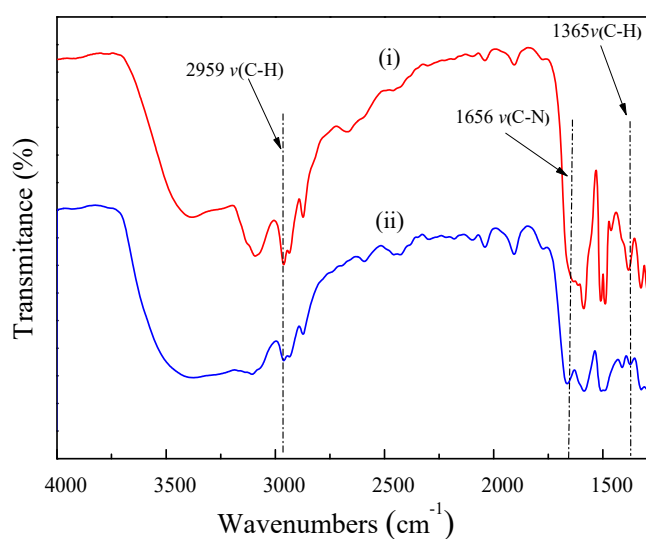

**Fig. S5** FT-IR spectra of the PES/PVlIL-0.4 membrane (i) before (ii) after immersing in a 2M KOH solution at 60 °C for 30 days.
